# Supplementary material for: Fast shoreline erosion induced by ship wakes in a coastal lagoon: Field evidence and remote sensing analysis
Source: PLoS One. 2017 Oct 31;12(10):e0187210. doi: 10.1371/journal.pone.0187210 (PMC5663627; doi:10.1371/journal.pone.0187210)
Supplement: S2 Table — Grain size distribution (in volumetric percentage) of sediment samples. (XLSX) [file pone.0187210.s002.xlsx]

## Sheet: Foglio1
	S2 Table.
	Sections	< 0.24	0.35	0.49	0.69	0.98	1.38	1.95	2.76	3.91	5.52	7.81	11.1	15.6	22.1	31.3	44.2	62.5	88.4	125	149	177	250	354	500	> 707
		µm	µm	µm	µm	µm	µm	µm	µm	µm	µm	µm	µm	µm	µm	µm	µm	µm	µm	µm	µm	µm	µm	µm	µm	µm
	T-I	0	0	0.09	0.29	0.41	0.54	0.64	0.73	0.85	0.96	0.96	0.96	1.34	1.63	0.92	0.99	6.91	20	14.61	14.93	23.49	8.74	0.01	0	0
	B-I	0.15	0.42	0.81	1.4	2.03	2.67	3.16	3.56	4.01	4.66	5.32	6.06	8.19	11.19	13.45	13.08	9.81	5.3	1.25	0.67	0.53	0.23	0.25	0.3	0.41
	T-II	0	0	0	0.12	0.21	0.25	0.28	0.35	0.45	0.51	0.51	0.6	0.93	1.04	0.77	2.75	10.88	23.56	15.08	14.39	20.76	6.53	0	0	0
	B-II	0.3	0.68	1.33	2.32	3.42	4.61	5.64	6.51	7.34	8.3	8.89	8.6	8.79	8.7	7.78	6.18	4.52	3.16	1.1	0.78	0.81	0.23	0.03	0	0
	T-VI	0	0	0.15	0.31	0.43	0.57	0.76	1.01	1.29	1.54	1.77	2.09	2.82	3.48	3.97	6.11	12.07	19.76	11.38	10.48	14.97	5.01	0	0	0
	B-VI	0	0	0.17	0.33	0.46	0.57	0.65	0.72	0.83	0.96	1	0.97	1.25	1.51	0.94	0.6	4.97	16.76	13.59	14.98	26.68	12.02	0.06	0	0
	T-IX	0	0.24	0.52	0.91	1.3	1.65	1.9	2.08	2.3	2.61	2.87	2.93	3.22	3.37	3.04	3.19	6.58	14.62	10.58	11.12	18.34	6.62	0.01	0	0
	B-IX	0	0.03	0.24	0.41	0.58	0.77	0.94	1.12	1.33	1.56	1.69	1.68	1.97	2.42	2.52	2.66	5.52	13.54	10.67	11.97	22.96	13.44	1.96	0	0
	T-XI	0.49	1.58	3.47	6.12	8.53	10.36	10.99	10.68	10.14	9.75	8.81	6.79	5.03	3.26	1.9	1.24	0.75	0.12	0	0	0	0	0	0	0
	B-XI	0	0	0.01	0.18	0.28	0.35	0.4	0.45	0.52	0.63	0.69	0.66	0.83	1.29	1.57	1.4	2.86	9.65	9.27	11.69	26.78	21.44	8.51	0.55	0
	T-XII	0.46	1.27	2.66	4.7	6.75	8.57	9.5	9.56	9.4	9.59	9.41	8.02	6.75	5.06	3.19	2.03	1.65	1.17	0.22	0.04	0	0	0	0	0
	B-XII	0	0.23	0.47	0.82	1.16	1.45	1.57	1.57	1.56	1.65	1.69	1.53	1.52	1.66	1.7	1.42	2.08	6.9	7.25	9.83	25.08	21.89	6.92	0.06	0
